# Supplementary material for: ESC: a comprehensive resource for SARS-CoV-2 immune escape variants
Source: PubMed Central journal article supplement (PMC8728294; doi:10.1093/nar/gkab895), 2021-10-13
Supplement: gkab895_supplemental_file.pdf [file gkab895_supplemental_file.pdf]

# ESC - a comprehensive resource for SARS-CoV-2 immune escape variants

## SUPPLEMENTARY DATASETS

**Supplementary Figure 1.** A brief comparison of the SARS-CoV-2 immune escape variant details from publicly available resources

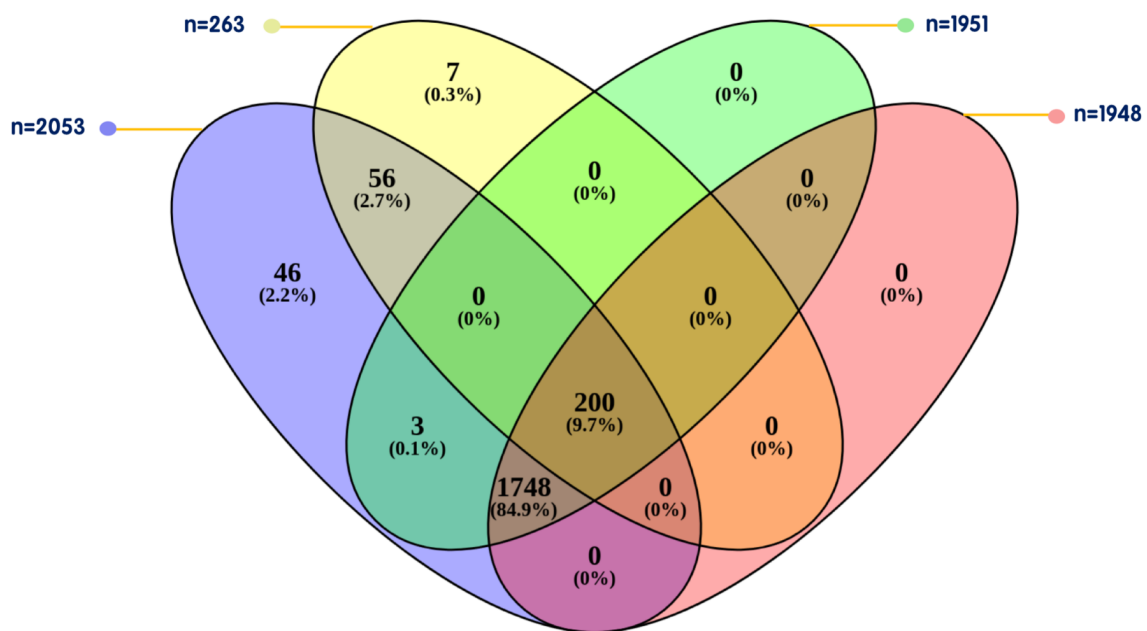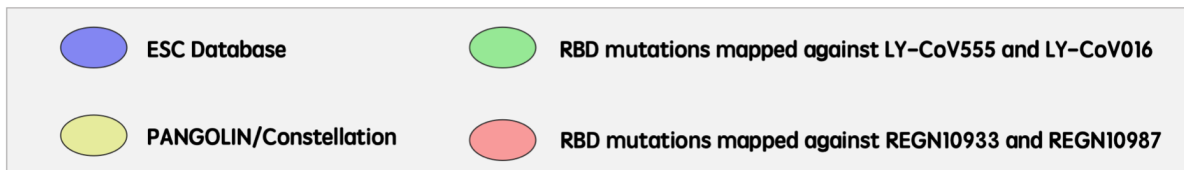

**Supplementary Table 1a.** Summary of publicly available resources with systematic collation of SARS-CoV-2 immune evasion variants

| S.No | Resource/Repository                                                                                                    | Contents and highlights                                                                                                                                                             | Total entries count                                            | Resource/Repository Link                                                                                                                                                                                                                                          |
|------|------------------------------------------------------------------------------------------------------------------------|-------------------------------------------------------------------------------------------------------------------------------------------------------------------------------------|----------------------------------------------------------------|-------------------------------------------------------------------------------------------------------------------------------------------------------------------------------------------------------------------------------------------------------------------|
| 1.   | PANGOLIN/Constellation                                                                                                 | <b>List of immune escape variants</b> in Spike protein along with the <b>associated antibodies</b>                                                                                  | <b>263</b>                                                     | <a href="https://github.com/cov-lineages/constellations/blob/main/constellations/data/escape_list.csv">https://github.com/cov-lineages/constellations/blob/main/constellations/data/escape_list.csv</a> (not available now)                                       |
| 2.   | Complete map of SARS-CoV-2 RBD mutations that escape the monoclonal antibody LY-CoV555 and its cocktail with LY-CoV016 | List of experimentally validated <b>immune escape fractions</b> for mutations sites in <b>Spike RBD</b> against <b>LY-CoV555, LY-CoV016 and cocktail of LY-CoV555 and LY-CoV016</b> | <b>1951</b>                                                    | <a href="https://github.com/jblloomlab/SARS-CoV-2-RBD_MAP_LY-CoV555/blob/main/results/supp_data/LY_cocktail_raw_data.csv">https://github.com/jblloomlab/SARS-CoV-2-RBD_MAP_LY-CoV555/blob/main/results/supp_data/LY_cocktail_raw_data.csv</a>                     |
| 3.   | Prospective mapping of viral mutations that escape antibodies used to treat COVID-19                                   | List of experimentally validated <b>immune escape fractions</b> for mutations sites in <b>Spike RBD</b> against <b>REGN10933, REGN10987 and cocktail of REGN10933 and REGN10987</b> | <b>1948</b>                                                    | <a href="https://github.com/jblloomlab/SARS-CoV-2-RBD_MAP_clinical_Abs/blob/main/results/supp_data/REGN_and_LY-CoV016_raw_data.csv">https://github.com/jblloomlab/SARS-CoV-2-RBD_MAP_clinical_Abs/blob/main/results/supp_data/REGN_and_LY-CoV016_raw_data.csv</a> |
| 4.   | Coronavirus Antiviral and Resistance Database                                                                          | List of variations and their corresponding escape fractions comprehensively collected from literature sources                                                                       | <b>All reported VoCs and Vols with isolated mutations also</b> | <a href="https://covdb.stanford.edu/page/susceptibility-data/">https://covdb.stanford.edu/page/susceptibility-data/</a>                                                                                                                                           |

**Supplementary Table 1b.** A complete summary of the highlights and contents of the resources and repositories of SARS-CoV-2 immune escape variants

| Resource/Repository                                  | Access             | Interface options                        | Variant annotations                                                                                                                                                                                                                                                                                                                                                                                                                                                                                                                                                                                                                                                 |
|------------------------------------------------------|--------------------|------------------------------------------|---------------------------------------------------------------------------------------------------------------------------------------------------------------------------------------------------------------------------------------------------------------------------------------------------------------------------------------------------------------------------------------------------------------------------------------------------------------------------------------------------------------------------------------------------------------------------------------------------------------------------------------------------------------------|
| PANGOLIN Constellation                               | Publicly available | No search interface                      | List of SARS-CoV-2 escape mutations with associated mAbs                                                                                                                                                                                                                                                                                                                                                                                                                                                                                                                                                                                                            |
| RBD mutations mapped against LY-CoV555 and LY-CoV016 | Publicly available | No search interface                      | Estimates of total and maximum escape fractions for RBD escape mutation sites against Ab cocktails                                                                                                                                                                                                                                                                                                                                                                                                                                                                                                                                                                  |
| RBD mutations mapped against REGN10933 and REGN10987 | Publicly available | No search interface                      | Estimates of total and maximum escape fractions for RBD escape mutation sites against Ab cocktails                                                                                                                                                                                                                                                                                                                                                                                                                                                                                                                                                                  |
| Coronavirus Antiviral and Resistance Database        | Publicly available | User friendly search options available   | Provides fold reductions in neutralization against a range of monoclonal antibodies and patient sera                                                                                                                                                                                                                                                                                                                                                                                                                                                                                                                                                                |
| ESC database                                         | Publicly available | User friendly search interface available | <p>Annotations on</p> <ul style="list-style-type: none"> <li>• VOCs/Vols</li> <li>• Protein Domains</li> <li>• B cell and T cell Epitopes</li> <li>• Associated mAbs, patient sera or vaccines</li> <li>• Conservation sites</li> <li>• Prediction of deleteriousness</li> <li>• Sites spanning diagnostic primers/probes and potential error prone regions</li> <li>• Global and geographical variant frequencies (including a graphical representation)</li> </ul> <p>Extensive literature curation on</p> <ul style="list-style-type: none"> <li>• Type of study</li> <li>• Experimental details</li> <li>• Details of neutralization escape efficacy</li> </ul> |

|  |  |  |                                                                                                                                                                                                                                                                                                   |
|--|--|--|---------------------------------------------------------------------------------------------------------------------------------------------------------------------------------------------------------------------------------------------------------------------------------------------------|
|  |  |  | <ul style="list-style-type: none"> <li>• Generation of monoclonal antibodies and mutant viruses</li> </ul> <p>Other available linkouts</p> <ul style="list-style-type: none"> <li>• User friendly linkouts to GISAID and CoVDB have been provided for extensive search of the variants</li> </ul> |
|--|--|--|---------------------------------------------------------------------------------------------------------------------------------------------------------------------------------------------------------------------------------------------------------------------------------------------------|

**Supplementary Table 2.** List of custom annotation features used for ANNOVAR annotations

|                                                |
|------------------------------------------------|
| <b>Custom Datasets</b>                         |
| <b>Variation Type</b>                          |
| <i>Non synonymous variant</i>                  |
| <i>Synonymous variant</i>                      |
| <b>SIFT_Score</b>                              |
| <b>SIFT_Prediction (Deleterious/Tolerable)</b> |
| <b>GERP</b>                                    |
| <b>PhyloP</b>                                  |
| <b>PhastCons</b>                               |
| <b>Uniprot_Domains</b>                         |
| <b>UNIPROT_Disulphite_Bond</b>                 |
| <b>UNIPROT_glyphos</b>                         |
| <b>UNIPROT_Transmembrane</b>                   |
| <b>IEDB_B-Cell_Epitopes</b>                    |
| <b>IEDB_CD4_Epitopes</b>                       |
| <b>IEDB_cd4Epitope_Score</b>                   |
| <b>IEDB_CD8_Epitopes</b>                       |
| <b>IEDB_cd8Epitope_Score</b>                   |
| <b>MPDI_Potential_Immunogenic_Regions</b>      |
| <b>MPDI_Potential_Immunodominant_Epitopes</b>  |
| <b>ARTIC_Primers</b>                           |
| <b>RT-PCR_Primers/Probes</b>                   |
| <b>Sequencing_Error_Sites</b>                  |
| <b>Homoplasic_Positions</b>                    |
| <b>Hypermutable_Sites</b>                      |
